# Supplementary material for: Long-Term Effectiveness of a Smartphone App and a Smart Band on Arterial Stiffness and Central Hemodynamic Parameters in a Population with Overweight and Obesity (Evident 3 Study): Randomised Controlled Trial
Source: MDPI journal article supplement (doi:10.3390/nu14224758), 2022-11-10
Supplement: s1 [file s1]

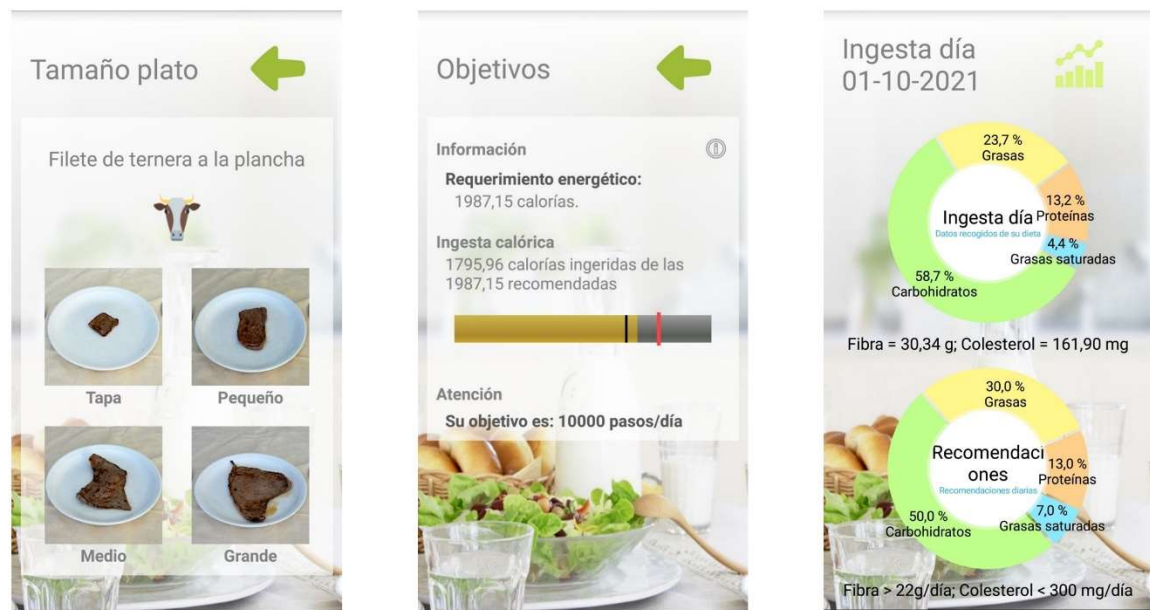

Figure S1. Evident 3 app screenshots.

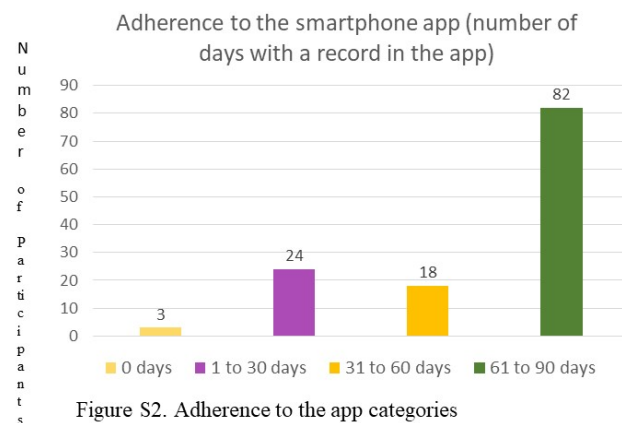

Table S1. Baseline characteristics comparison between subjects who completed the study and those who dropped out.

| Characteristics       | Complete (n = 217) | Loss of follow-up (n = 36) | p value |
|-----------------------|--------------------|----------------------------|---------|
| Age, mean years (SD)  | 47.83 (9.85)       | 47.51 (9.40)               | 0.813   |
| Sex, n (%)            |                    |                            | 0.564   |
| Men                   | 66 (30.4)          | 11 (30.6)                  |         |
| Women                 | 151 (69.6)         | 25 (69.4)                  |         |
| Smoking status, n (%) |                    |                            | 0.533   |
| Non smoker            | 44 (20.3)          | 9 (25.0)                   |         |
| Smoker                | 86 (39.6)          | 16 (44.4)                  |         |
| Former smoker         | 87 (40.1)          | 11 (30.6)                  | 0.533   |

| <b>Clinical variables, mean (SD)</b> |                |                |       |
|--------------------------------------|----------------|----------------|-------|
| BMI (kg/m <sup>2</sup> )             | 32.81 (3.24)   | 33.17 (3.50)   | 0,536 |
| Systolic blood pressure (mmHg)       | 115.17 (13.80) | 116.78 (17.26) | 0,534 |
| Diastolic blood pressure (mmHg)      | 78.96 (8.56)   | 80.60 (11.11)  | 0,353 |
| Heart rate (bpm)                     | 68.13 (9.76)   | 71.83 (9.52)   | 0,056 |
| Total Cholesterol (mg/dL)            | 193.77 (34.21) | 186.89 (30.26) | 0,263 |
| HDL Cholesterol (mg/dL)              | 50.69 (12.10)  | 53.00 (11.90)  | 0,294 |
| LDL Cholesterol (mg/dL)              | 118.10 (29.36) | 11.00 (27.27)  | 0,182 |
| Triglycerides (mg/dL)                | 123.29 (63.84) | 122.31 (91.68) | 0,938 |
| Glycaemia (mg/dL)                    | 90.76 (15.32)  | 94.34 (20.91)  | 0,226 |
| HbA1c (%)                            | 5.47 (0.41)    | 5.52 (0.65)    | 0,541 |
| Cardiovascular Risk (%)              | 6.01 (5.81)    | 5.78 (7.44)    | 0,833 |
| <b>Chronic diseases, n (%)</b>       |                |                |       |
| Hypertension                         | 57 (26.3)      | 11 (30.6)      | 0.362 |
| Dyslipidemia                         | 48 (22.1)      | 6 (17.1)       | 0.338 |
| Diabetes Mellitus                    | 3 (1.4)        | 1 (2.8)        | 0.461 |
| <b>Medication use, n(%)</b>          |                |                |       |
| Antihypertensive drugs               | 36 (16.6)      | 4 (11.1)       | 0.288 |
| Lipid-lowering drugs                 | 36 (16.6)      | 5 (13.9)       | 0.451 |

BMI, body mass index; bmp, beats per minute; LDL-cholesterol, low-density lipoprotein cholesterol; HDL cholesterol, high-density lipoprotein cholesterol; HbA1c, glycosylated hemoglobin. Categorical variables are expressed as n (%) and continuous variables as mean  $\pm$  standard deviation. \* Statistically significant differences ( $p < 0.05$ ).

**Table S2.** Correlation between days of use of the app and measures analyzed globally and by sex.

|                                         | <b>Global</b> | <b>Men</b> | <b>Women</b> |
|-----------------------------------------|---------------|------------|--------------|
| <b>3-month change, mean difference</b>  |               |            |              |
| cfPWV, m/sec                            | -0.106        | 0.006      | -0.154       |
| baPWV, m/sec                            | -.180*        | -0.050     | -.287**      |
| CAVI                                    | -0.036        | 0.011      | -0.054       |
| cSBP (mmHg)                             | -0.114        | -0.163     | -0.098       |
| cDBP (mmHg)                             | -.206*        | -0.239     | -0.193       |
| CAIx                                    | -0.023        | 0.154      | -0.097       |
| PAIx                                    | -0.017        | 0.194      | -0.075       |
| AP (mmHg)                               | 0.067         | 0.135      | 0.055        |
| ED (%)                                  | -0.087        | -0.232     | -0.029       |
| SEVR (%)                                | 0.161         | 0.188      | 0.156        |
| <b>12-month change, mean difference</b> |               |            |              |
| cfPWV, m/sec                            | -0.054        | 0.159      | -0.180       |
| baPWV, m/sec                            | -0.100        | -0.054     | -0.131       |
| CAVI                                    | -0.019        | -0.036     | -0.013       |
| cSBP (mmHg)                             | -0.147        | -0.145     | -0.148       |
| cDBP (mmHg)                             | -0.164        | -0.235     | -0.130       |
| CAIx                                    | -0.079        | 0.148      | -0.169       |
| PAIx                                    | 0.067         | 0.162      | -0.048       |
| AP (mmHg)                               | -0.048        | 0.267      | -0.140       |
| ED (%)                                  | 0.008         | -0.066     | 0.034        |
| SEVR (%)                                | -0.048        | -0.024     | -0.050       |

cfPWV, carotid-femoral pulse wave velocity; baPWV, brachial-ankle pulse wave velocity; CAVI, cardio-ankle vascular index. cSBP, central systolic

blood pressure; cDBP, central diastolic blood pressure; CAIx, Central Augmentation Index; PAIx, Peripheral Augmentation Index; AP, Augmented pressure; ED%, ejection duration ratio; SEVR%, subendocardial viability ratio.
